# Supplementary material for: Pro-inflammatory adjuvant properties of pigment-grade titanium dioxide particles are augmented by a genotype that potentiates interleukin 1β processing
Source: PubMed Central journal article supplement (PMC5721614; doi:10.1186/s12989-017-0232-2), 2017-12-08
Supplement: 12989_2017_232_MOESM2_ESM.pdf [file 12989_2017_232_MOESM2_ESM.pdf]

**A**

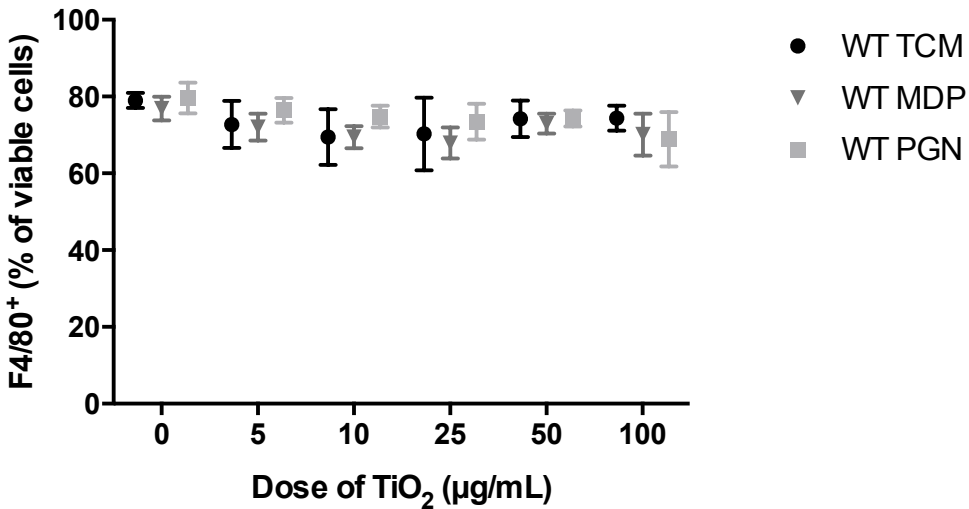

**B**

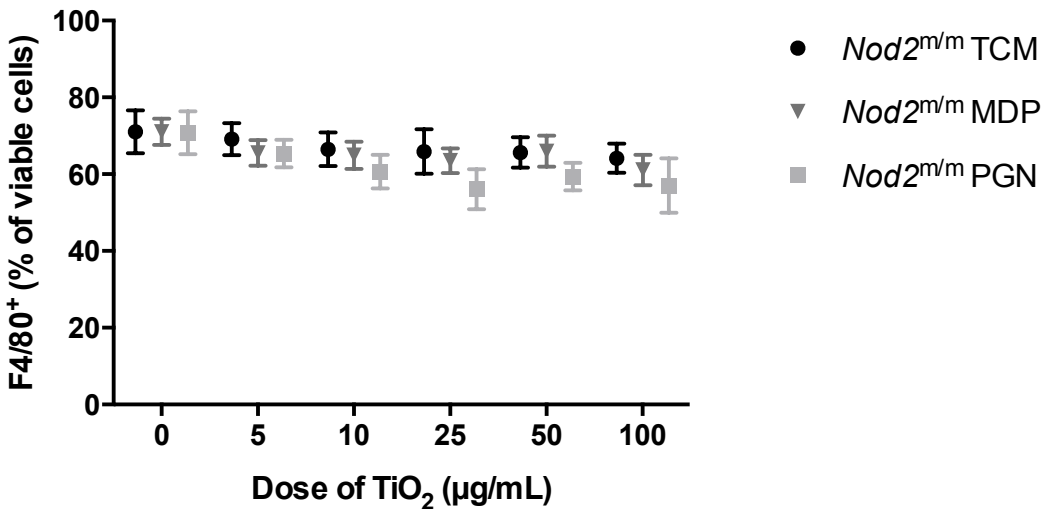

**Fig. Additional file 2** BMDMs from WT (**A**) and  $Nod2^{m/m}$  (**B**) mice were pre-stimulated for 3 h with LPS (10 ng/mL). Then BMDMs were incubated for 3 h with the indicated concentrations of food- and pharmaceutical-grade anatase  $\text{TiO}_2$  particles suspended in TCM alone (TCM), TCM + 10  $\mu\text{g/mL}$  MDP (MDP), or TCM + 10  $\mu\text{g/mL}$  peptidoglycan (PGN). Cells were analysed with flow cytometry, and F4/80 expressions of  $\text{PI}^-$  cells were recorded. Data represent mean  $\pm$  SD from two independent experiments with three replicates each,  $n = 6$ .
